# Supplementary material for: Simultaneous Analysis of Organic Acids, Glycerol and Phenolic Acids in Wines Using Gas Chromatography-Mass Spectrometry
Source: MDPI journal article supplement (doi:10.3390/foods13020186), 2024-01-05
Supplement: s1 [file s1]

## Supplementary Materials.

**Table S1.** List of 54 compounds used for PCA analysis identified by the NIST 17 library from aged red wine. Identification quality > 70%.

| Number | Compounds                  | Number | Compounds                   |
|--------|----------------------------|--------|-----------------------------|
| 1      | 2,3-Butanediol 1           | 28     | 3-hydroxydodecanoic acid    |
| 2      | 2,3-Butanediol 2           | 29     | Oxaloacetic acid            |
| 3      | 1,3-Propanediol            | 30     | Tyrosol                     |
| 4      | Lactic acid                | 31     | 2-Isopropylmalic acid       |
| 5      | 3-hydroxyisovaleric acid   | 32     | Unknown 5                   |
| 6      | Unknown 1                  | 33     | 1,2,3-ButaneTriol           |
| 7      | Glyoxylic acid             | 34     | 4-hydroxybenzoic acid       |
| 8      | 2-Furoic acid              | 35     | ⊙-ketoglutaric acid         |
| 9      | 1,4-Butanediol             | 36     | 3,3-dimethyl glutaric acid  |
| 10     | Pyruvic acid               | 37     | Tartaric acid               |
| 11     | 4-hydroxybutanoic acid     | 38     | Phloretic acid              |
| 12     | 2-hydroxyvaleric acid      | 39     | Vanillic acid               |
| 13     | Sorbic acid                | 40     | 2,6-dihydroxybenzoic acid   |
| 14     | Glyoxime                   | 41     | Protocatechuic acid         |
| 15     | 2-Phenylethanol            | 42     | Citric acid                 |
| 16     | 1-Propanol                 | 43     | Isocitric acid              |
| 17     | Hexanoic acid              | 44     | Unknown 6                   |
| 18     | Unknown 2                  | 45     | Syringic acid               |
| 19     | Methyl ethyl Succinic acid | 46     | 4-hydroxy phenyllactic acid |
| 20     | Unknown 3                  | 47     | 4-Coumaric acid             |
| 21     | Octanoic acid              | 48     | Ethyl Gallate               |
| 22     | Glycerol                   | 49     | Shikimic acid               |
| 23     | Succinic acid              | 50     | Gallic acid                 |
| 24     | 2-Pentanol                 | 51     | Palmitic acid               |
| 25     | Unknown 4                  | 52     | Caffeic acid                |
| 26     | Citramalic acid            | 53     | 4-Hydroxyphenyllactic acid  |
| 27     | Malic acid                 | 54     | Stearic acid                |

**Table S2.** Characteristic ions and retention times of TMS derivatized organic acids, glycerol, **phenolic acids** and **internal standard (tridecanoic acid)** used for peak integration in SIM detection method according to [29] (Roessner et al., 2000).

| Chromatogram number | Compounds                    | Retention time (min) | Characteristic ions ( <i>m/z</i> )  |
|---------------------|------------------------------|----------------------|-------------------------------------|
| 1                   | Lactic acid                  | 5.455                | 117, 133, 147, 191, 219, 234        |
| 2                   | Glyoxylic acid               | 7.141                | 73, 147, 190, 218, 233              |
| 3                   | Pyruvic acid                 | 7.753                | 75, 95, 125, 151, 169, 184          |
| 4                   | Sorbic acid                  | 8.186                | 73, 147, 214, 233, 261, 304         |
| 5                   | Glycerol                     | 10.984               | 73, 103, 117, 133, 147, 205         |
| 6                   | Succinic acid                | 11.651               | 73, 129, 147, 247, 262              |
| 7                   | Fumaric acid                 | 12.429               | 83, 133, 143, 147, 245              |
| 8                   | Citramalic acid              | 15.229               | 73, 115, 147, 247, 259, 349         |
| 9                   | Malic acid                   | 15.724               | 73, 133, 147, 233, 245, 335         |
| 10                  | <b>Cinnamic acid</b>         | <b>16.311</b>        | <b>77, 103, 131, 161, 205, 220</b>  |
| 11                  | Oxaloacetic acid             | 16.452               | 73, 89, 142, 184, 276, 333          |
| 12                  | $\alpha$ -Ketoglutaric acid  | 18.411               | 73, 147, 156, 198, 229, 288         |
| 13                  | Tartaric acid                | 18.831               | 73, 147, 189, 219, 292, 423         |
| 14                  | <b>Tridecanoic acid (IS)</b> | <b>20.288</b>        | <b>73, 117, 129, 145, 271, 286</b>  |
| 15                  | <b>Vanillic acid</b>         | <b>20.636</b>        | <b>73, 223, 267, 297, 312</b>       |
| 16                  | <b>Shikimic acid</b>         | <b>21.823</b>        | <b>73, 147, 204, 255, 372, 462</b>  |
| 17                  | Citric acid                  | 21.944               | 147, 273, 347, 363, 375, 465        |
| 18                  | <b>Syringic acid</b>         | <b>22.949</b>        | <b>73, 253, 297, 312, 327, 342</b>  |
| 19                  | <b>p-Coumaric acid</b>       | <b>23.484</b>        | <b>73, 179, 219, 249, 293, 308</b>  |
| 20                  | <b>Gallic acid</b>           | <b>24.098</b>        | <b>73, 281, 355, 443, 458</b>       |
| 21                  | <b>Ferulic acid</b>          | <b>25.870</b>        | <b>73, 249, 293, 308, 323, 338</b>  |
| 22                  | <b>Caffeic acid</b>          | <b>26.664</b>        | <b>103, 147, 205, 292, 319, 333</b> |

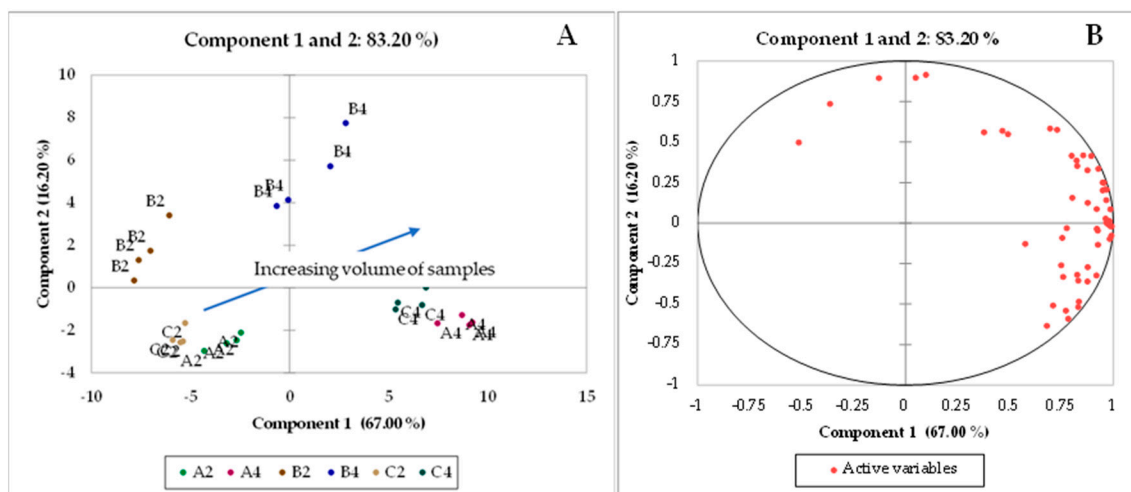

**Figure S1.** Graphs of the effect of extraction solvent on profiles of aged red wines obtained by hydroxylamine and MSTFA derivatization (A) and variable loadings (B). A, 2 x ethyl acetate; B, 1 x ethyl acetate + 1 x diethyl ether; C, 1 x ethyl acetate + 1 x MTBE. 2, 200  $\mu$ l; 4, 400  $\mu$ l.

- 29 Roessner, U.; Wagner, C.; Kopka, J.; Trethewey, R.N.; Willmitzer, L. Simultaneous analysis of metabolites in potato tuber by gas chromatography-mass spectrometry. *Plant J.* **2000**, *23*, 131–142. <https://doi.org/10.1046/j.1365-313x.2000.00774.x>.
